# Supplementary material for: Nitrogen/oxygen/sulfur tri-doped hard carbon nanospheres derived from waste tires with high sodium and potassium anodic performances
Source: Royal Society of Chemistry journal article supplement (doi:10.1039/d2qi02378d), 2023-01-01
Supplement: d2qi02378d1.pdf [file d2qi02378d1.pdf]

## Supplementary information

### **Nitrogen/oxygen/sulfur tri-doped hard carbon nanospheres derived from waste tires with high sodium and potassium anodic performances**

Qian Zhao,<sup>a,b,c,1</sup> Qiaotian Zheng,<sup>a,1</sup> Shenghu Li,<sup>a</sup> Bin He,<sup>a</sup> Xiulong Wu,<sup>a</sup> Yujue Wang,<sup>c</sup>

Qingyuan Wang,<sup>a,c</sup> Yan Meng,<sup>d\*</sup> and Dan Xiao,<sup>c,d\*</sup>

<sup>a</sup> *College of Mechanical Engineering, Chengdu University, No. 2025, Chengluo Road, Chengdu 610106, PR China.*

<sup>b</sup> *Solid-state Fermentation Resource Utilization Key Laboratory of Sichuan Province, Yibin University, No. 8, Jiusheng Road, Yibin 644000, PR China.*

<sup>c</sup> *Institute for Advanced Study, Chengdu University, Chengdu 610106, PR China.*

<sup>d</sup> *Institute of New Energy and Low-Carbon Technology, Sichuan University, Chengdu 610065, PR China.*

---

\* Corresponding authors. E-mail address: meng.yan.scu@hotmail.com (Y. Meng), xiaodan@scu.edu.cn (D. Xiao).

<sup>1</sup> These authors contributed equally to this work.

***XPS etching:*** Al K $\alpha$  microfocusing monochromatic source was adopted for XPS etching, and CAE scanning mode was used to achieve high-performance data acquisition with low power consumption (72 W). The vacuum degree of the analysis room is  $\leq 2 \times 10^{-7}$  mbar. Full spectrum scanning was performed with a flux of 100 eV and a step size of 1 eV, and narrow-spectrum scanning was performed with a pass energy of 30 to 50 eV and a step size of 0.05 to 0.1 eV. The number of scans was adjusted 5-20 times in combination with the pass, step size and signal strength. C1s (284.8 eV) was used as the standard for binding energy correction.

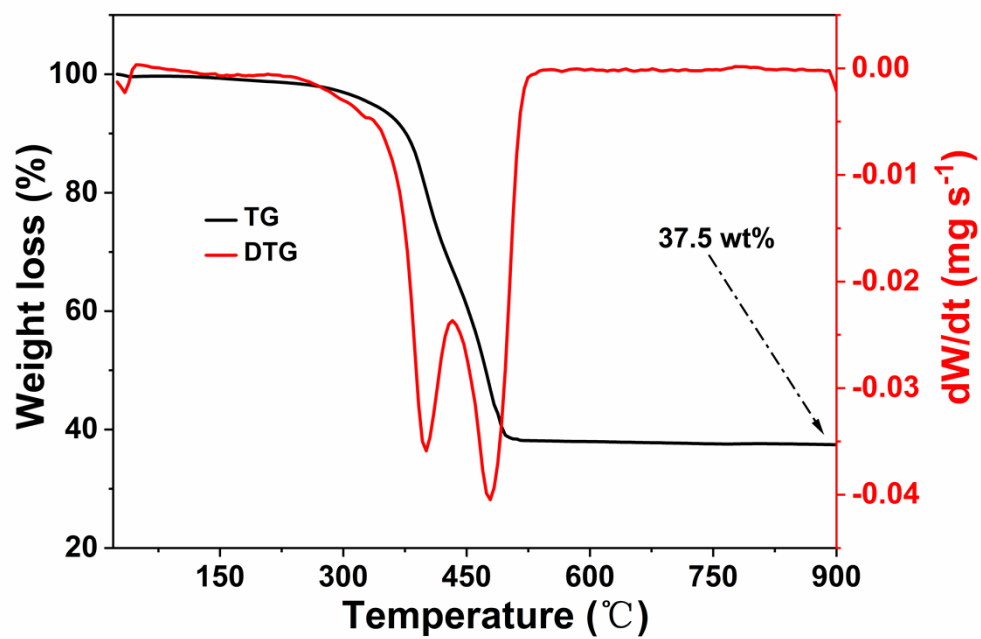

**Fig. S1** TG curve of the waste tires pyrolyzed in argon at a heating rate of  $5\text{ }^{\circ}\text{C min}^{-1}$ .

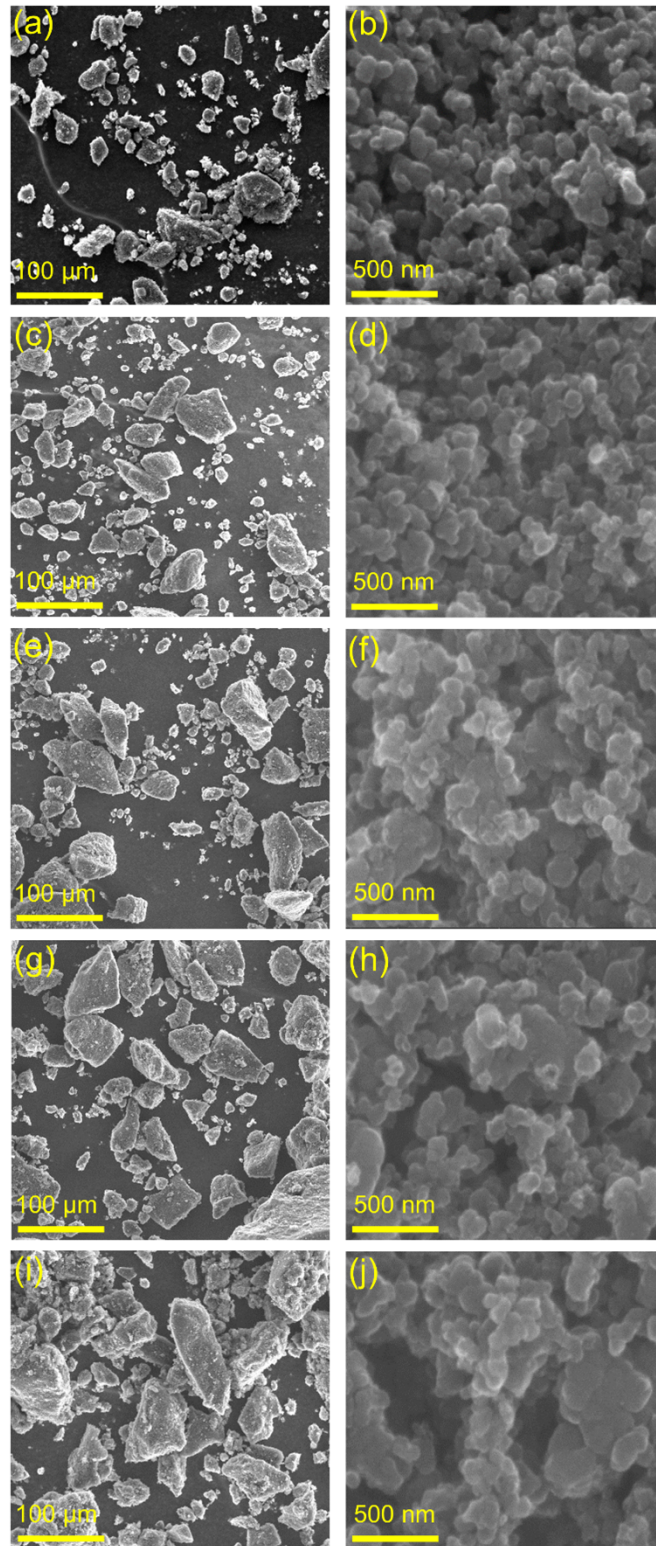

**Fig. S2** The SEM images of NOS-HCs. (a, b) NOS-HC700, (c, d) NOS-HC800, (e, f) NOS-HC900, (g, h) NOS-HC1000 and (i, j) NOS-HC1100.

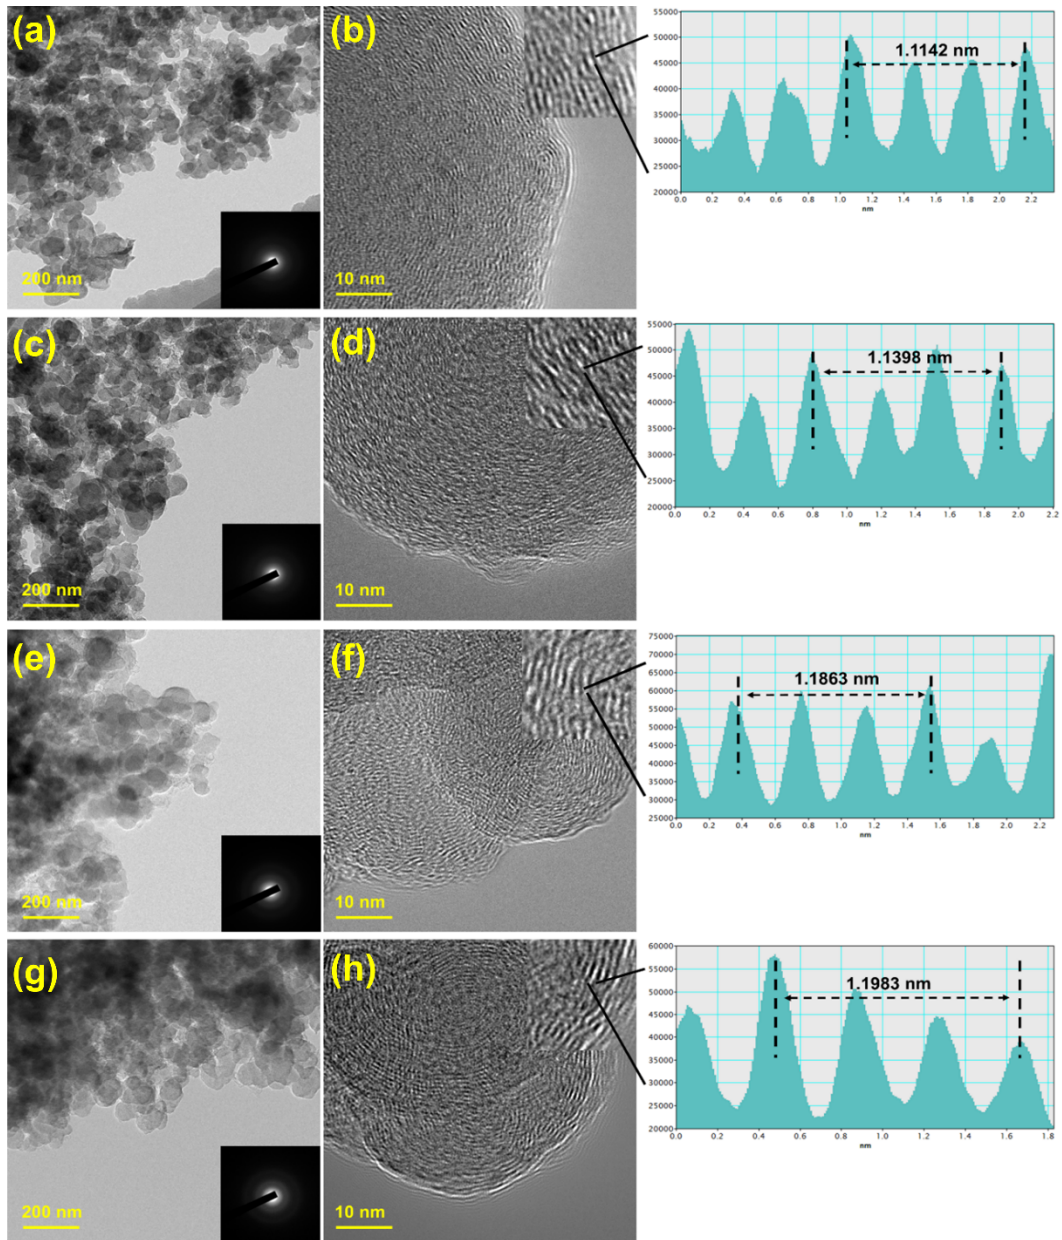

**Fig. S3** The TEM images and lattice fringes (insets) of NOS-HCs: (a, b) NOS-HC700, (c, d) NOS-HC800, (e, f) NOS-HC1000 and (g, h) NOS-HC1100.

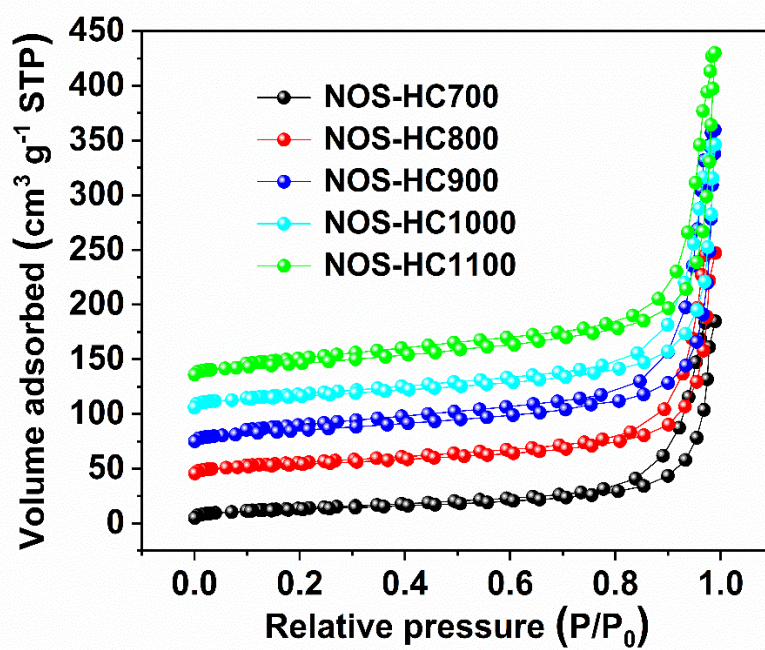

Fig. S4 The N<sub>2</sub> adsorption-desorption isotherms curves.

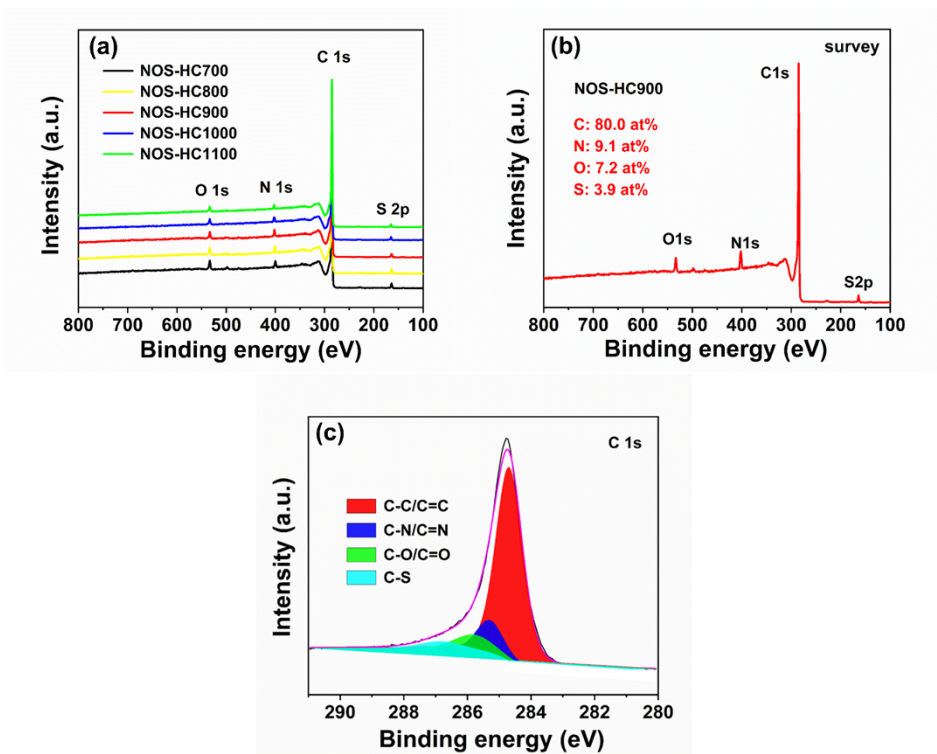

**Fig. S5** XPS survey spectrums of the NOS-HCs, (b) the survey spectra and chemical composition of NOS-HC900 and (c) the C 1s spectrum.

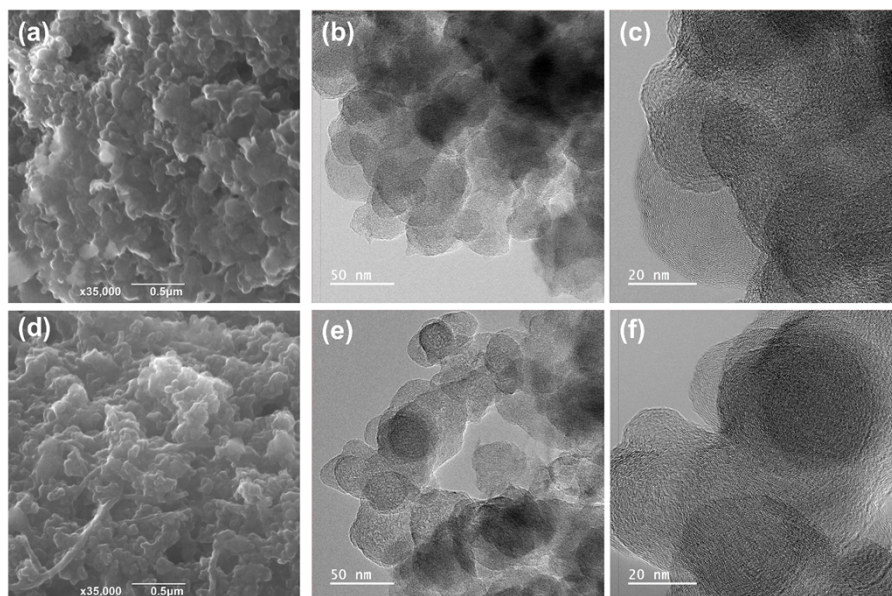

**Fig. S6** The microstructure of NOS-HC900 with after cycling: the SEM image of SIBs (a) and PIBs (b), the TEM image of SIBs (b, c) and PIBs (e, f).



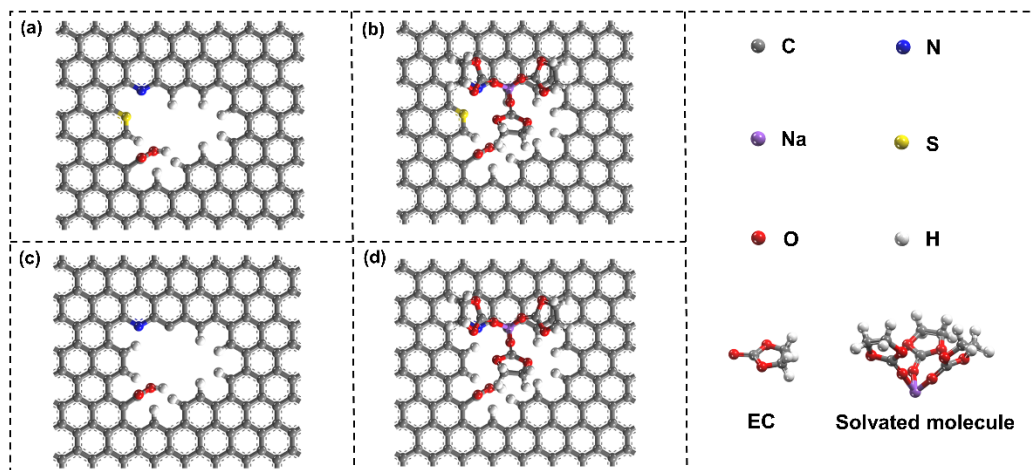

**Fig. S7** Model structure showing interactions between solvated molecules and doped carbon: (a, b) N, O, S tri-doping model, (c, d) N, O co-doping model.

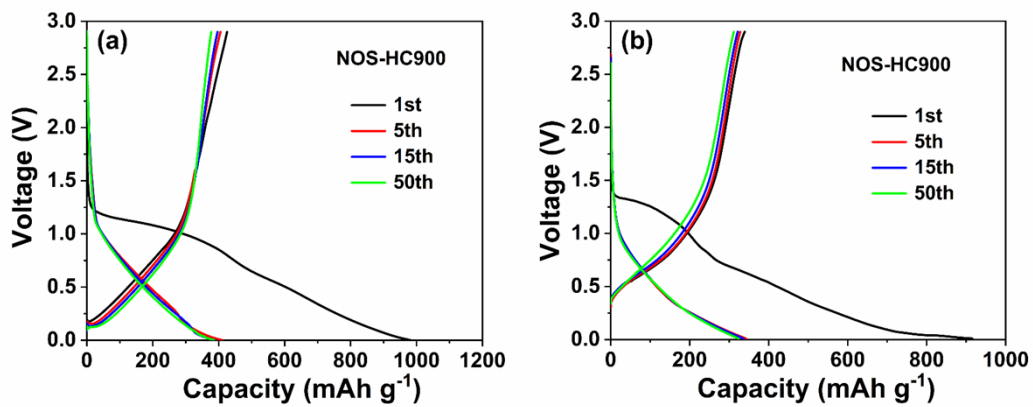

**Fig. S8** The GCD profiles from 1st to 500th cycle at  $100 \text{ mA g}^{-1}$ .

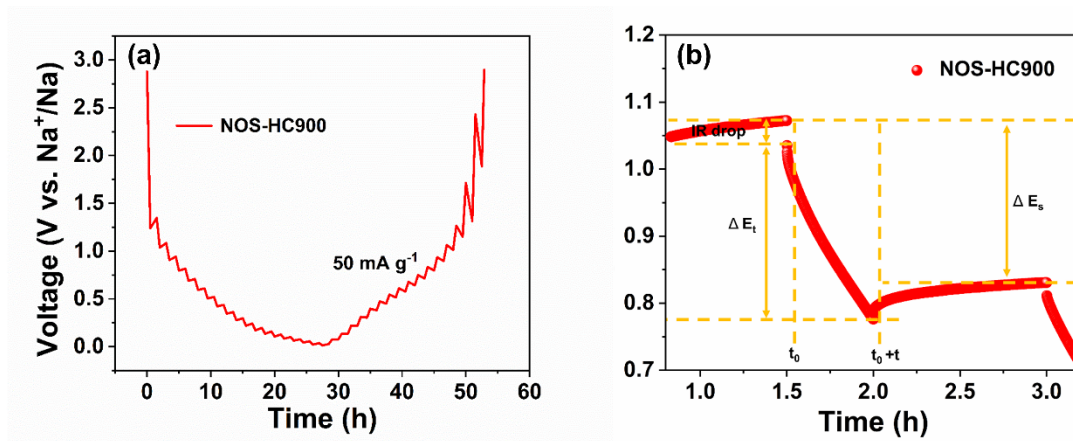

**Fig. S9** (a) GITT profile as a function of time during the 300th cycle in the voltage range of 0.01-2.9 V (vs. Na<sup>+</sup>/Na) for NOS-HC900. (b) The determination of  $\Delta E_t$  and  $\Delta E_s$  from the measured GITT profiles.

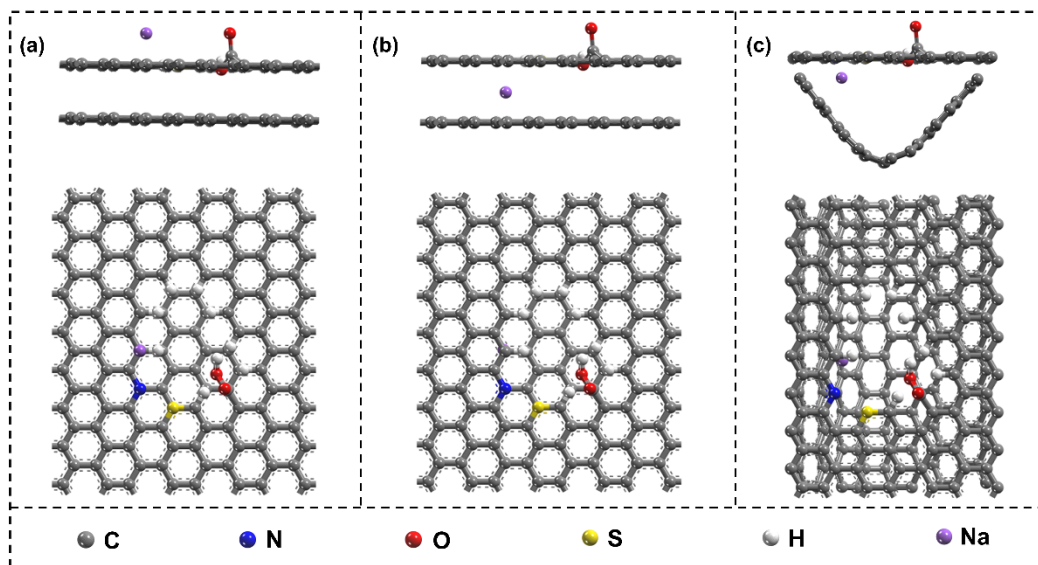

**Fig. S10** The stable structures for Na acting on different active sites: (a) adsorption, (b) intercalation and (c) pore-filling.

**Table S1** Textural properties of the samples of NOS-HC700, NOS-HC800, NOS-HC900, NOS-HC1000 and NOS-HC1100.

| Samples     | $d_{(002)}$<br>(nm) | $I_D/I_G$ | $S_{\text{BET}}$<br>( $\text{m}^2 \text{g}^{-1}$ ) | $V_p$<br>( $\text{cm}^3 \text{g}^{-1}$ ) |
|-------------|---------------------|-----------|----------------------------------------------------|------------------------------------------|
| NOS-HCs700  | 0.371               | 0.93      | 60.1                                               | 0.45                                     |
| NOS-HCs800  | 0.380               | 0.99      | 57.7                                               | 0.33                                     |
| NOS-HCs900  | 0.392               | 1.02      | 55.8                                               | 0.29                                     |
| NOS-HCs1000 | 0.395               | 1.05      | 49.9                                               | 0.24                                     |
| NOS-HCs1100 | 0.401               | 1.10      | 45.1                                               | 0.18                                     |

**Table S2** Peak assignment of C 1s, N 1s, O 1s and S 2p for NOS-HC900.

| Peak | Binding energy (eV) | Assignment                  | Fraction of species (%) |
|------|---------------------|-----------------------------|-------------------------|
| C 1s | 284.7               | C-C/C=C                     | 78.6                    |
|      | 285.3               | C-N/C=N                     | 9.8                     |
|      | 285.8               | C-O/C=O                     | 7.4                     |
|      | 286.8               | C-S                         | 4.2                     |
| N 1s | 398.5               | Pyridinic N                 | 14.1                    |
|      | 400.9               | Graphitic N                 | 56.9                    |
|      | 402.7               | Pyridine-N                  | 29.0                    |
| O 1s | 531.8               | C=O                         | 18.9                    |
|      | 533.1               | O-C-O/C-OH                  | 63.3                    |
|      | 534.6               | COOH                        | 17.8                    |
| S 2p | 164.3               | S 2p <sub>3/2</sub> : C-S-C | 58.1                    |
|      | 165.4               | S 2p <sub>1/2</sub> : C-S-C | 25.4                    |
|      | 168.4               | Oxidized sulfur species     | 16.4                    |

**Table S3** Element analysis of samples under different temperatures

| Sample     | C     | H    | N    | O    | S    |
|------------|-------|------|------|------|------|
| NOS-HC700  | 77.18 | 0.51 | 8.73 | 9.51 | 4.07 |
| NOS-HC800  | 79.57 | 0.45 | 8.84 | 7.20 | 3.94 |
| NOS-HC900  | 81.67 | 0.32 | 8.46 | 5.93 | 3.62 |
| NOS-HC1000 | 84.87 | 0.28 | 6.95 | 5.37 | 2.53 |
| NOS-HC1100 | 88.69 | 0.27 | 4.57 | 4.49 | 1.98 |

The element content is calculated by a mass fraction (wt.%, dry basis).

**Table S4** Comparison of the sodium-storage performance for carbon-based anode in the recent literatures with our sample.

| Electrode materials                      | Rate performance                                                      | Cycling performance                                                            | Ref.            |
|------------------------------------------|-----------------------------------------------------------------------|--------------------------------------------------------------------------------|-----------------|
|                                          | Charge (mAh g <sup>-1</sup> ) / Current density (mA g <sup>-1</sup> ) | Charge (mAh g <sup>-1</sup> ) / Current density (mA g <sup>-1</sup> ) / Cycles |                 |
| <b>NOS-HC900</b>                         | <b>425.3 / 100</b><br><b>315.1 / 2000</b>                             | <b>402.5 / 100 / 1000</b>                                                      | <b>Our work</b> |
| <b>HC/VC-1300</b>                        | 420 / 50<br>68 / 1000                                                 | 261 / 100 / 100                                                                | [1]             |
| <b>HC-Al<sub>2</sub>O<sub>3</sub>-5%</b> | 321.5 / 50<br>83.6 / 1000                                             | 72.6 / 1000 / 2000                                                             | [2]             |
| <b>SHCs-1500</b>                         | 305 / 30                                                              | 286 / 30 / 300                                                                 | [3]             |
| <b>CSHP2</b>                             | 250 / 100<br>123 / 1000                                               | 215 / 100 / 100                                                                | [4]             |
| <b>PFHC-20</b>                           | 334.3 / 20                                                            | 196.9 / 100 / 300                                                              | [5]             |
| <b>NSC2</b>                              | 280 / 50<br>102 / 10                                                  | 223 / 1000 / 2000                                                              | [6]             |
| <b>NPDCs-700</b>                         | 212 / 2000<br>150 / 5000                                              | 197 / 2000 / 2000                                                              | [7]             |
| <b>carbon@750 C</b>                      | 367.6 / 50<br>65.8 / 5000                                             | 161.5 / 2000 / 5000                                                            | [8]             |
| <b>SAC-750</b>                           | 67 / 3000                                                             | 303 / 100 / 100                                                                | [9]             |
| <b>HPC-UP-6</b>                          | 416.9 / 50<br>253.6 / 1000                                            | 341.5 / 50 / 100                                                               | [10]            |
| <b>BPC-1100</b>                          | 400 / 50<br>145 / 1000                                                | 332.8 / 50 / 400                                                               | [11]            |
| <b>HCMT-1300</b>                         | 302 / 100<br>201 / 1000                                               | 301 / 100 / 100                                                                | [12]            |
| <b>ENMC</b>                              | 234 / 100<br>129 / 2000                                               | 154 / 1000 / 1000                                                              | [13]            |
| <b>WSC-1500</b>                          | 352 / 100<br>182 / 1000                                               | 305 / 100 / 200                                                                | [14]            |
| <b>HCS-3</b>                             | 310.5 / 50                                                            | 266.2 / 100 / 300                                                              | [15]            |



**Table S5** Equivalent circuit parameters of the NOS-HC900 for SIBs after cycling.

| Type | Cycle number            | $R_s$ /Ohm | $R_{SEI}$ /Ohm | $R_{ct}$ /Ohm |
|------|-------------------------|------------|----------------|---------------|
| SIBs | Pristine                | 7.8        | 4.9            | 158.9         |
|      | 10 <sup>th</sup> cycle  | 6.1        | 10.2           | 67.5          |
|      | 50 <sup>th</sup> cycle  | 6.0        | 15.3           | 44.3          |
|      | 100 <sup>th</sup> cycle | 5.9        | 15.6           | 42.9          |
| PIBs | Pristine                | 18.1       | 82.5           | 1580.2        |
|      | 10 <sup>th</sup> cycle  | 26.3       | 143.1          | 837.6         |
|      | 50 <sup>th</sup> cycle  | 34.5       | 154.4          | 386.3         |
|      | 100 <sup>th</sup> cycle | 48.2       | 158.1          | 368.5         |

**Table S6** Comparison of the potassium-storage performance for carbon-based anode in the recent literatures with our sample.

| Electrode materials | Rate performance                                                      | Cycling performance                                                            | Ref.            |
|---------------------|-----------------------------------------------------------------------|--------------------------------------------------------------------------------|-----------------|
|                     | Charge (mAh g <sup>-1</sup> ) / Current density (mA g <sup>-1</sup> ) | Charge (mAh g <sup>-1</sup> ) / Current density (mA g <sup>-1</sup> ) / Cycles |                 |
| NOS-HC900           | <b>342.6 / 100</b><br><b>231.7 / 2000</b>                             | <b>322.7 / 100 / 1000</b>                                                      | <b>Our work</b> |
| HCLP                | 300 / 50<br>121 / 2000                                                | 211.6 / 50 / 200                                                               | [16]            |
| MW-HC               | 321.5 / 50<br>170 / 200                                               | 136 / 200 / 100                                                                | [17]            |
| CQDHC               | 313 / 100                                                             | 237 / 100 / 150                                                                | [18]            |
| NO-YS-CS            | 473.7 / 20<br>183.3 / 1000                                            | 215 / 500 / 2500                                                               | [19]            |
| SHC-3               | 298.1 / 100                                                           | 283.8 / 100 / 1000                                                             | [20]            |
| NSO-HCN             | 209.6 / 50<br>136.0 / 500                                             | 184.2 / 100 / 200                                                              | [21]            |
| I/N-HC              | 278 / 200<br>150 / 800                                                | 185 / 200 / 400                                                                | [22]            |
| PI-T-Pab            | 200.3 / 50                                                            | 146.1 / 100 / 100                                                              | [23]            |
| CS-1000             | 298 / 100<br>262 / 200                                                | 217 / 200 / 500                                                                | [24]            |
| N-CNC               | 254.0 / 100<br>107.9 / 2000                                           | 132.9 / 1000 / 200                                                             | [25]            |
| PNTCDA@900          | 220.7 / 100<br>193.9 / 200                                            | 169.0 / 100 / 150                                                              | [26]            |
| SPCS                | 232.6 / 200                                                           | 165.2 / 1000 / 1500                                                            | [27]            |
| N-CLNTs-700         | 303.4 / 50<br>266.0 / 100                                             | 261.0 / 50 / 150                                                               | [28]            |
| NCS-5               | 302 / 50<br>280 / 100                                                 | 205 / 1000 / 2000                                                              | [29]            |
| OPDMC               | 224 / 30                                                              | 150.3 / 200 / 2000                                                             | [30]            |

**Table S7** XPS binding energy values and peak assignment for C 1s.

| C 1s  | Position |       | Position |       | Position |       | Peak assignment     |
|-------|----------|-------|----------|-------|----------|-------|---------------------|
|       | (eV)     | 0 nm  | (eV)     | 15 nm | (eV)     | 30 nm |                     |
| 3th   | 283.2    | 18.1% | 283.1    | 16.6% | 282.9    | 30.6% | Na <sub>x</sub> -HC |
|       | 284.5    | 29.2% | 284.4    | 14.3% | 284.2    | 43.5% | C-C, C-H            |
|       | 286.0    | 35.5% | 285.9    | 33.2% | 285.8    | 11.9% | C-O                 |
|       | 288.6    | 17.2% | 288.5    | 35.9% | 288.5    | 14.0% | RCO <sub>3</sub>    |
| 300th | 283.5    | 4.3%  | 283.0    | 42.2% | 282.9    | 39.4% | Na <sub>x</sub> -HC |
|       | 284.5    | 48.2% | 284.2    | 20.8% | 283.9    | 25.0% | C-C, C-H            |
|       | 286.0    | 22.7% | 285.7    | 12.9% | 285.5    | 9.5%  | C-O                 |
|       | 288.4    | 24.8% | 288.3    | 24.1% | 288.1    | 26.1% | RCO <sub>3</sub>    |

## References

- [1] F. Chen, Y. Di, Q. Su, D. Xu, Y. Zhang, S. Zhou, et al., Vanadium-modified hard carbon spheres with sufficient pseudographitic domains as high-performance anode for sodium-ion batteries, *Carbon Energy* (2022).
- [2] C. Yu, Y. Li, H. Ren, J. Qian, S. Wang, X. Feng, et al., Engineering homotype heterojunctions in hard carbon to induce stable solid electrolyte interfaces for sodium-ion batteries, *Carbon Energy* (2022).
- [3] B. Yang, J. Wang, Y. Zhu, K. Ji, C. Wang, D. Ruan, et al., Engineering hard carbon with high initial coulomb efficiency for practical sodium-ion batteries, *J. Power Sources* 492 (2021) 229656.
- [4] S. Chen, K. Tang, F. Song, Z. Liu, N. Zhang, S. Lan, et al., Porous hard carbon spheres derived from biomass for high-performance sodium/potassium-ion batteries, *Nanotechnology* 33 (2021) 055401.
- [5] G. Zhang, L. Zhang, Q. Ren, L. Yan, F. Zhang, W. Lv, et al., Tailoring a Phenolic Resin Precursor by Facile Pre-oxidation Tactics to Realize a High-Initial-Coulombic-Efficiency Hard Carbon Anode for Sodium-Ion Batteries, *ACS Appl. Mater. Inter.* 13 (2021) 31650-31659.
- [6] Q. Jin, K. Wang, P. Feng, Z. Zhang, S. Cheng, K. Jiang, Surface-dominated storage of heteroatoms-doping hard carbon for sodium-ion batteries, *Energy Stor. Mater.* 27 (2020) 43-50.
- [7] T. Shi, X. Wei, J. Zheng, F. Kong, P. Cui, D. Wu, et al., Soybean Roots-Derived N, P Co-doped Mesoporous Hard Carbon for Boosting Sodium and Potassium-ion Batteries, *Carbon* 178 (2021) 233-242.
- [8] J. Sun, Y. Sun, J.A.S. Oh, Q. Gu, W. Zheng, M. Goh, et al., Insight into the structure-capacity relationship in biomass derived carbon for high-performance sodium-ion batteries, *J. Energy Chem.* 62 (2021) 497-504.
- [9] C. Senthil, J.W. Park, N. Shaji, G.S. Sim, C.W. Lee, Biomass seaweed-derived nitrogen self-doped porous carbon anodes for sodium-ion batteries: Insights into the structure and electrochemical activity, *J. Energy Chem.* 64 (2022) 286-295.
- [10] J. Zhang, D. Zhang, K. Li, Y. Tian, Y. Wang, T. Sun, N, O and S co-doped

- hierarchical porous carbon derived from a series of samara for lithium and sodium storage: Insights into surface capacitance and inner diffusion, *J. Colloid Interf. Sci.* 598 (2021) 250-259.
- [11] C. Chen, Y. Huang, Y. Zhu, Z. Zhang, Z. Guang, Z. Meng, et al., Nonignorable influence of oxygen in hard carbon for sodium ion storage, *ACS Sustain. Chem. Eng.* 8 (2020) 1497-1506.
- [12] D. Yang, S. Li, D. Cheng, L. Miao, W. Zhong, X. Yang, et al., Nitrogen, sulfur, and phosphorus codoped hollow carbon microtubes derived from silver willow blossoms as a high-performance anode for sodium-ion batteries, *Energ. Fuel.* 35 (2021) 2795-2804.
- [13] S. Huang, D. Yang, X. Qiu, W. Zhang, Y. Qin, C. Wang, et al., Boosting Surface-Dominated Sodium Storage of Carbon Anode Enabled by Coupling Graphene Nanodomains, Nitrogen-Doping, and Nanoarchitecture Engineering, *Adv. Funct. Mater.* (2022) 2203279.
- [14] Q. Li, Y.N. Zhang, S. Feng, D. Liu, G. Wang, Q. Tan, et al., N, S self-doped porous carbon with enlarged interlayer distance as anode for high performance sodium ion batteries, *Int. J. Energ. Res.* 45 (2021) 7082-7092.
- [15] X. Chen, Y. Fang, H. Lu, H. Li, X. Feng, W. Chen, et al., Microstructure-dependent charge/discharge behaviors of hollow carbon spheres and its implication for sodium storage mechanism on hard carbon anodes, *Small* 17 (2021) 2102248.
- [16] Z. Liu, S. Wu, Y. Song, T. Yang, Z. Ma, X. Tian, et al., Non-negligible Influence of Oxygen in Hard Carbon as an Anode Material for Potassium-Ion Batteries, *ACS Appl. Mater. Inter.* (2022).
- [17] Z. Wu, J. Zou, S. Shabanian, K. Golovin, J. Liu, The roles of electrolyte chemistry in hard carbon anode for potassium-ion batteries, *Chem. Eng. J.* 427 (2022) 130972.
- [18] Y. Guo, Y. Feng, H. Li, Y. Wang, Z. Wen, G. Zhou, Carbon quantum dots in hard carbon: An approach to achieving PIB anodes with high potassium adsorption, *Carbon* 189 (2022) 142-151.
- [19] S. Chong, L. Yuan, T. Li, C. Shu, S. Qiao, S. Dong, et al., Nitrogen and Oxygen

- Co-Doped Porous Hard Carbon Nanospheres with Core-Shell Architecture as Anode Materials for Superior Potassium-Ion Storage, *Small* 18 (2022) 2104296.
- [20] X. Chen, X.-B. Cheng, Z. Liu, High sulfur-doped hard carbon anode from polystyrene with enhanced capacity and stability for potassium-ion storage, *J. Energy Chem.* 68 (2022) 688-698.
- [21] M. Chen, Y. Cao, C. Ma, H. Yang, AN/S/O-tridoped hard carbon network anode from mercaptan/polyurethane-acrylate resin for potassium-ion batteries, *Nano Energy* 81 (2021) 105640.
- [22] Y. Zhang, Y. Yang, C. Huang, H. Fan, D. Yuan, W.-B. Luo, et al., Understanding the effect of I/N dual-doped hard carbon for high performance K-ion storage, *Electrochim. Acta* 394 (2021) 139146.
- [23] M. Wang, Y. Zhu, Y. Zhang, T. Yang, J. Duan, C. Wang, Cost-effective hard-soft carbon composite anodes with promising potassium ions storage performance, *Electrochim. Acta* 368 (2021) 137649.
- [24] D. Wang, G. Du, D. Han, Q. Su, S. Ding, M. Zhang, et al., Porous flexible nitrogen-rich carbon membranes derived from chitosan as free-standing anodes for potassium-ion and sodium-ion batteries, *Carbon* 181 (2021) 1-8.
- [25] F. Yuan, H. Sun, D. Zhang, Z. Li, J. Wang, H. Wang, et al., Enhanced electron transfer and ion storage in phosphorus/nitrogen co-doped 3D interconnected carbon nanocage toward potassium-ion battery, *J. Colloid Interf. Sci.* 611 (2022) 513-522.
- [26] Y. Liu, Q. Ru, Y. Gao, Q. An, F. Chen, Z. Shi, et al., Constructing volcanic-like mesoporous hard carbon with fast electrochemical kinetics for potassium-ion batteries and hybrid capacitors, *Appl. Surf. Sci.* 525 (2020) 146563.
- [27] H. Zhang, C. Luo, H. He, H.-H. Wu, L. Zhang, Q. Zhang, et al., Nano-size porous carbon spheres as a high-capacity anode with high initial coulombic efficiency for potassium-ion batteries, *Nanoscale horiz.* 5 (2020) 895-903.
- [28] S. Tian, Y. Wang, T. Cai, D. Kong, D. Wang, H. Ren, et al., Polyaniline-derived carbon nanotubes as anode materials for potassium-ion batteries: insight into the effect of N-doping, *Appl. Surf. Sci.* 534 (2020) 147635.

- [29] Y. Li, K. Xiao, C. Huang, J. Wang, M. Gao, A. Hu, et al., Enhanced potassium-ion storage of the 3d carbon superstructure by manipulating the nitrogen-doped species and morphology, *Nano-micro lett.* 13 (2021) 1-14.
- [30] R. Verma, P.N. Didwal, J.Y. Hwang, C.J.J.B. Park, Supercaps, Recent Progress in Electrolyte Development and Design Strategies for Next-Generation Potassium-Ion Batteries, *Batteries Supercaps* 4 (2021) 1428-1450.
